# Supplementary material for: Newly identified Gon4l/Udu-interacting proteins implicate novel functions
Source: PubMed Central journal article supplement (PMC7449961; doi:10.1038/s41598-020-70855-9), 2020-08-26
Supplement: 41598_2020_70855_MOESM1_ESM.pdf [file 41598_2020_70855_MOESM1_ESM.pdf]

# **Supplementary Information**

**for**

## **Newly identified Gon4l/Udu-interacting proteins implicate novel functions**

**Su-Mei Tsai<sup>1</sup>, Kuo-Chang Chu<sup>1</sup> & Yun-Jin Jiang<sup>1,2,3,4,5\*</sup>**

<sup>1</sup>Institute of Molecular and Genomic Medicine, National Health Research Institutes, Zhunan, Miaoli County, Taiwan

<sup>2</sup>Laboratory of Developmental Signalling and Patterning, Institute of Molecular and Cell Biology, Singapore

<sup>3</sup>Biotechnology Center, National Chung Hsing University, Taichung, Taiwan

<sup>4</sup>Institute of Molecular and Cellular Biology, National Taiwan University, Taipei, Taiwan

<sup>5</sup>Department of Life Science, Tunghai University, Taichung, Taiwan

**Supplementary Table S1. Physically Gon4l/Udu-interacting proteins of humans collected from BioGRID database.**

| Official Symbol Interactor | Synonyms of Interactor                              | Experimental System | GO terms                                                                                                                     | Reference (PMID)     |
|----------------------------|-----------------------------------------------------|---------------------|------------------------------------------------------------------------------------------------------------------------------|----------------------|
| CRAMP1L                    | HN1L TCE4                                           | Affinity Capture-MS | chromatin binding; DNA-binding transcription factor activity, RNA polymerase II-specific                                     | 28514442<br>30413360 |
| H2AFX                      | H2A.X H2A/X H2AX                                    | Affinity Capture-MS | damaged DNA binding; DNA binding; histone binding; protein heterodimerization activity                                       | 28514442<br>28242625 |
| HIST1H2AB                  | H2A/m H2AFM                                         | Affinity Capture-MS | DNA binding; protein heterodimerization activity                                                                             | 27248496             |
| HIST1H2BA                  | H2BFU STBP TSH2B TSH2B.1 bA317E16.3                 | Affinity Capture-MS | DNA binding; histone binding; protein heterodimerization activity                                                            | 28514442<br>26186194 |
| HIST1H2BB                  | H2B.1 H2B/f H2BFF                                   | Affinity Capture-MS | DNA binding; histone binding; protein heterodimerization activity                                                            | 27248496             |
| HIST1H2BG                  | H2B.1A H2B/a H2BFA dJ221C16.8                       | Proximity Label-MS  | DNA binding; histone binding; protein heterodimerization activity                                                            | 25281560             |
| ESR2                       | ER-BETA ESR-ETA ESRB ESTRB Erb NR3A2                | Affinity Capture-MS | DNA-binding transcription factor activity, RNA polymerase II-specific; estrogen receptor activity; nuclear receptor activity | 29509190             |
| DHX16                      | DBP2 DDX16 PRO2014 PRP8 PRPF2 Prp2                  | Co-fractionation    | ATPase activity; RNA helicase activity; mRNA splicing                                                                        | 22939629             |
| PNKD                       | BRP17 DYT8 FPD1 KIPP1184 MR-1 MR1 PDC PKND1 TAHCCP2 | Affinity Capture-MS | hydroxyacylglutathione hydrolase activity; metal ion binding; regulation of synaptic transmission, dopaminergic              | 28514442<br>26186194 |
| ASB3                       | ASB-3                                               | Affinity Capture-MS | post-translational protein modification; protein ubiquitination                                                              | 28514442             |

**Supplementary Table S2. List of Gon4l/Udu-interacting proteins used for model organism Phenotype Enrichment Analysis.**

| Symbol    | Name                                                             | Ensembl no. (mouse homolog) | Reference (PMID)/Source               | phenotype annotated |
|-----------|------------------------------------------------------------------|-----------------------------|---------------------------------------|---------------------|
| MCM3      | minichromosome maintenance complex component 3, mRNA             | ENSMUSG00000041859          | 19656853 and this study               | y                   |
| MCM4      | minichromosome maintenance complex component 4 , mRNA            | ENSMUSG00000022673          | 19656853 and this study               | y                   |
| NPAT      | Nuclear Protein, Ataxia-Telangiectasia Locus                     | ENSMUSG00000033054          | 25339177 and this study               | y                   |
| CRY1      | cryptochrome circadian regulator 1ba, transcript variant 1, mRNA | ENSMUSG00000020038          | this study                            | y                   |
| THOC1     | Tho complex 1, also known as Tho1, HPR1                          | ENSMUSG00000024287          | this study                            | y                   |
| BAP1      | BRCA1-associated protein 1                                       | ENSMUSG00000021901          | this study                            | y                   |
| DNMT1     | DNA methyltransferase 1                                          | ENSMUSG00000004099          | this study                            | y                   |
| CRAMP1L   | Cramped-like, cramp1L                                            | ENSMUSG00000038002          | BioGRID <sup>3.5</sup> and this study | y                   |
| H2AX      | H2A histone family member X                                      | ENSMUSG00000049932          | BioGRID <sup>3.5</sup>                | y                   |
| HIST1H2AB | Histone cluster 1 H2A family member b                            | ENSMUSG00000061615          | BioGRID <sup>3.5</sup>                | n                   |
| HIST1H2BA | Histone cluster 1 H2B family member a                            | ENSMUSG00000050799          | BioGRID <sup>3.5</sup>                | n                   |
| HIST1H2BB | Histone cluster 1 H2B family member b                            | ENSMUSG00000075031          | BioGRID <sup>3.5</sup>                | n                   |
| HIST1H2BG | Histone cluster 1 H2B family member g                            | ENSMUSG00000058385          | BioGRID <sup>3.5</sup>                | n                   |
| ESR2      | Estrogen receptor 2                                              | ENSMUSG00000021055          | BioGRID <sup>3.5</sup>                | y                   |
| ASB3      | Ankyrin repeat and SOCS box containing 3                         | ENSMUSG00000020305          | BioGRID <sup>3.5</sup>                | n                   |
| PNKD      | PNKD metallo-beta-lactamase domain containing                    | ENSMUSG00000026179          | BioGRID <sup>3.5</sup>                | y                   |
| DHX16     | DEAH (Asp-Glu-Ala-His) box polypeptide 16                        | ENSMUSG00000024422          | BioGRID <sup>3.5</sup>                | y                   |
| YY1       | Ying-Yang 1 transcription factor                                 | ENSMUSG00000021264          | 21454521 and BioGRID <sup>3.5</sup>   | y                   |
| SIN3A     | SIN3 transcription regulator family member A                     | ENSMUSG00000042557          | 21454521 and BioGRID <sup>3.5</sup>   | y                   |
| HDAC1     | Histone deacetylase 1                                            | ENSMUSG00000028800          | 21454521 and BioGRID <sup>3.5</sup>   | y                   |

**Supplementary Table S3: Gon4L/Udu-interacting protein-enriched phenotypes of mouse phenome database (Gene Expression Database (GXD), Mouse Genome Informatics Web Site, MGI6.14).**

| Phenotype Name                                | Phenotype ID | BH FDR corrected P-value | Genes with the term                               |
|-----------------------------------------------|--------------|--------------------------|---------------------------------------------------|
| increased thymus tumor incidence              | MP:0010365   | 0.006                    | mcm4, h2afx                                       |
| increased T cell derived lymphoma incidence   | MP:0002024   | 0.006                    | mcm4, h2afx                                       |
| embryonic lethality, complete penetrance      | MP:0011092   | 0.007                    | mcm4, dnmt1, yy1, hdac1                           |
| increased hemolymphoid system tumor incidence | MP:0010296   | 0.007                    | mcm4, esr2, h2afx                                 |
| prenatal lethality                            | MP:0002080   | 0.012                    | mcm3, mcm4, thoc1, bap1, dnmt1, yy1, sin3a, hdac1 |
| decreased cell proliferation                  | MP:0000352   | 0.012                    | mcm3, mcm4, dnmt1, h2afx, hdac1                   |
| abnormal dopamine level                       | MP:0001905   | 0.014                    | esr2, pnkd                                        |
| embryonic lethality                           | MP:0008762   | 0.014                    | mcm4, thoc1, bap1, dnmt1, yy1, sin3a, hdac1       |
| increased organ/body region tumor incidence   | MP:0010274   | 0.014                    | mcm4, esr2, h2afx                                 |
| increased classified tumor incidence          | MP:0010273   | 0.014                    | mcm4, esr2, h2afx                                 |
| abnormal classified tumor incidence           | MP:0020188   | 0.016                    | mcm4, esr2, h2afx                                 |
| abnormal organ/body region tumor incidence    | MP:0013152   | 0.016                    | mcm4, esr2, h2afx                                 |
| chromosomal instability                       | MP:0008866   | 0.018                    | mcm4, h2afx                                       |
| abnormal apoptosis                            | MP:0001648   | 0.021                    | mcm3, thoc1, dnmt1, esr2, h2afx                   |
| abnormal cell proliferation                   | MP:0000350   | 0.022                    | mcm3, mcm4, dnmt1, esr2, h2afx, hdac1             |
| embryo phenotype                              | MP:0005380   | 0.023                    | mcm4, npat, thoc1, bap1, dnmt1, yy1, hdac1        |
| increased cell death                          | MP:0012556   | 0.024                    | mcm3, thoc1, dnmt1, esr2                          |
| increased tumor incidence                     | MP:0002020   | 0.024                    | mcm4, esr2, h2afx                                 |
| increased apoptosis                           | MP:0006042   | 0.024                    | mcm3, thoc1, dnmt1, esr2                          |
| increased embryonic tissue cell apoptosis     | MP:0013504   | 0.028                    | thoc1, dnmt1                                      |
| increased lymphoma incidence                  | MP:0012431   | 0.028                    | mcm4, h2afx                                       |



Supplementary Table S3: continued

| Phenotype Name                                                                     | Phenotype ID | BH FDR corrected P-value | Genes with the term            |
|------------------------------------------------------------------------------------|--------------|--------------------------|--------------------------------|
| embryonic lethality prior to organogenesis                                         | MP:0013292   | 0.029                    | mcm4, thoc1, bap1, sin3a       |
| embryonic lethality between implantation and placentation                          | MP:0009850   | 0.029                    | mcm4, bap1, sin3a              |
| abnormal cell cycle                                                                | MP:0003077   | 0.03                     | mcm3, mcm4, hdac1              |
| increased gland tumor incidence                                                    | MP:0010288   | 0.033                    | mcm4, h2afx                    |
| abnormal apocrine gland morphology                                                 | MP:0013554   | 0.034                    | mcm4, esr2                     |
| embryonic lethality between implantation and somite formation, complete penetrance | MP:0011096   | 0.036                    | mcm4, sin3a                    |
| abnormal chromosome stability                                                      | MP:0010094   | 0.036                    | mcm4, h2afx                    |
| abnormal embryonic tissue cell apoptosis                                           | MP:0013503   | 0.04                     | thoc1, dnmt1                   |
| abnormal mammary gland morphology                                                  | MP:0000627   | 0.04                     | mcm4, esr2                     |
| preweaning lethality, complete penetrance                                          | MP:0011100   | 0.04                     | mcm4, npat, bap1, dnmt1, hdac1 |
| embryonic lethality prior to tooth bud stage                                       | MP:0013293   | 0.046                    | mcm4, thoc1, bap1, sin3a       |

**Supplementary Table S4: Bap1-, Dnmt1-, and Thoc1-enriched phenotypes of mouse phenome database (Gene Expression Database (GXD), Mouse Genome Informatics Web Site, MGI6.14).**

| Phenotype Name                               | Phenotype ID | BH FDR corrected P-value | Genes with the term (Ensembl no.) |
|----------------------------------------------|--------------|--------------------------|-----------------------------------|
| increased embryonic tissue cell apoptosis    | MP:0013504   | 0.001                    | thoc1, dnmt1                      |
| abnormal embryonic tissue cell apoptosis     | MP:0013503   | 0.003                    | thoc1, dnmt1                      |
| abnormal embryo development                  | MP:0001672   | 0.006                    | thoc1, bap1, dnmt1                |
| abnormal embryonic tissue physiology         | MP:0008932   | 0.006                    | thoc1, dnmt1                      |
| embryonic lethality                          | MP:0008762   | 0.012                    | thoc1, bap1, dnmt1                |
| increased apoptosis                          | MP:0006042   | 0.015                    | thoc1, dnmt1                      |
| embryonic lethality prior to organogenesis   | MP:0013292   | 0.017                    | thoc1, bap1                       |
| prenatal lethality                           | MP:0002080   | 0.021                    | thoc1, bap1, dnmt1                |
| increased cell death                         | MP:0012556   | 0.021                    | thoc1, dnmt1                      |
| embryonic lethality prior to tooth bud stage | MP:0013293   | 0.021                    | thoc1, bap1                       |
| embryo phenotype                             | MP:0005380   | 0.024                    | thoc1, bap1, dnmt1                |
| abnormal embryonic growth/weight/body size   | MP:0002088   | 0.033                    | thoc1, bap1                       |
| abnormal apoptosis                           | MP:0001648   | 0.035                    | thoc1, dnmt1                      |
| preweaning lethality, complete penetrance    | MP:0011100   | 0.044                    | dnmt1, bap1                       |
| abnormal cell death                          | MP:0000313   | 0.046                    | thoc1, dnmt1                      |

**Supplementary Table S5: Gon4/Udu-interacting protein-enriched phenotypes of *Caenorhabditis elegans* database from modPhEA (WBPhenotype, data version: WormBase web site, <http://www.wormbase.org>, release WS273, November 2019).**

| Phenotype Name                                       | Phenotype ID        | BH FDR corrected P-value | Genes with the term (Ensembl no.)               |
|------------------------------------------------------|---------------------|--------------------------|-------------------------------------------------|
| nuclear morphology variation early emb               | WBPhenotype:0001026 | 0.00001194               | mcm4, h2afx, hist1h2ab                          |
| nuclear appearance number defective early emb        | WBPhenotype:0001035 | 0.00002388               | mcm3, mcm4, h2afx, hist1h2ab                    |
| sister chromatid segregation defective early emb     | WBPhenotype:0000772 | 0.00006323               | mcm3, h2afx, hist1h2ab, hist1h2ba               |
| nucleus defective early emb                          | WBPhenotype:0001138 | 0.0001597                | mcm3, mcm4, h2afx, hist1h2ab                    |
| embryonic cell morphology variant                    | WBPhenotype:0000770 | 0.0003568                | mcm3, mcm4, h2afx, hist1h2ab                    |
| chromosome segregation variant                       | WBPhenotype:0000773 | 0.0003568                | mcm3, h2afx, hist1h2ab, hist1h2ba, hdac1        |
| pharyngeal development variant                       | WBPhenotype:0000707 | 0.0003568                | h2afx, hist1h2ab, hist1h2ba, hdac1              |
| pronuclear nuclear appearance variant emb            | WBPhenotype:0001374 | 0.0006685                | mcm3, mcm4, h2afx, hist1h2ab                    |
| protruding vulva                                     | WBPhenotype:0000697 | 0.0006685                | mcm3, h2afx, hist1h2ab, hist1h2ba, sin3a, hdac1 |
| pronuclear nuclear appearance defective early emb    | WBPhenotype:0001034 | 0.0006685                | mcm3, mcm4, h2afx, hist1h2ab                    |
| cell corpse degradation variant                      | WBPhenotype:0010004 | 0.0006685                | h2afx, hist1h2ab, hist1h2ba                     |
| anaphase bridging                                    | WBPhenotype:0001875 | 0.0006685                | h2afx, hist1h2ab, hist1h2ba                     |
| vulva morphology variant                             | WBPhenotype:0000695 | 0.0009539                | mcm3, h2afx, hist1h2ab, hist1h2ba, sin3a, hdac1 |
| hermaphrodite reproductive system morphology variant | WBPhenotype:0001335 | 0.0009645                | mcm3, h2afx, hist1h2ab, hist1h2ba, sin3a, hdac1 |
| cytokinesis defective early emb                      | WBPhenotype:0001078 | 0.0009736                | mcm3, h2afx, hist1h2ab, hist1h2ba               |
| cytokinesis variant emb                              | WBPhenotype:0001018 | 0.001                    | mcm3, h2afx, hist1h2ab, hist1h2ba               |
| mitotic chromosome segregation variant               | WBPhenotype:0001378 | 0.001                    | h2afx, hist1h2ab, hist1h2ba                     |
| body elongation defective                            | WBPhenotype:0000242 | 0.001                    | h2afx, hist1h2ab, hist1h2ba                     |
| early embryonic lethal                               | WBPhenotype:0001100 | 0.001                    | mcm3, mcm4, h2afx, hist1h2ab, hist1h2ba, hdac1  |

Supplementary Table S5: continued

| Phenotype Name                                 | Phenotype ID        | BH FDR corrected P-value | Genes with the term (Ensembl no.)                     |
|------------------------------------------------|---------------------|--------------------------|-------------------------------------------------------|
| body elongation variant                        | WBPhenotype:0001478 | 0.002                    | h2afx, hist1h2ab, hist1h2ba                           |
| organ system development variant               | WBPhenotype:0000530 | 0.003                    | mcm3, mcm4, h2afx, hist1h2ab, hist1h2ba, sin3a, hdac1 |
| embryonic cell organization biogenesis variant | WBPhenotype:0000764 | 0.003                    | mcm3, mcm4, h2afx, hist1h2ab                          |
| cytokinesis variant                            | WBPhenotype:0002408 | 0.003                    | mcm3, h2afx, hist1h2ab, hist1h2ba                     |
| programmed cell death variant                  | WBPhenotype:0001172 | 0.004                    | mcm4, h2afx, hist1h2ab, hist1h2ba, hdac1              |
| embryonic arrest                               | WBPhenotype:0000867 | 0.004                    | h2afx, hist1h2ab, hist1h2ba, hdac1                    |
| apoptosis variant                              | WBPhenotype:0000730 | 0.004                    | mcm4, h2afx, hist1h2ab, hist1h2ba, hdac1              |
| thin                                           | WBPhenotype:0000164 | 0.004                    | mcm4, h2afx, hist1h2ab, hist1h2ba                     |
| pattern of transgene expression variant        | WBPhenotype:0000961 | 0.004                    | mcm3, mcm4, h2afx, hist1h2ab, hist1h2ba, sin3a, hdac1 |
| reproductive system morphology variant         | WBPhenotype:0000605 | 0.007                    | mcm3, h2afx, hist1h2ab, hist1h2ba, sin3a, hdac1       |
| embryonic cell physiology variant              | WBPhenotype:0000763 | 0.007                    | mcm3, mcm4, h2afx, hist1h2ab                          |
| cell death variant                             | WBPhenotype:0000729 | 0.007                    | mcm4, h2afx, hist1h2ab, hist1h2ba, hdac1              |
| alimentary system development variant          | WBPhenotype:0000617 | 0.007                    | h2afx, hist1h2ab, hist1h2ba, hdac1                    |
| organism hypertonic lethality increased        | WBPhenotype:0001751 | 0.008                    | h2afx, hist1h2ab                                      |
| transgene expression increased                 | WBPhenotype:0001236 | 0.008                    | h2afx, hist1h2ab, hist1h2ba, sin3a, hdac1             |
| maternal sterile                               | WBPhenotype:0000689 | 0.008                    | mcm3, h2afx, hist1h2ab, hist1h2ba, hdac1              |
| chromosome condensation variant                | WBPhenotype:0001361 | 0.009                    | h2afx, hist1h2ab, hist1h2ba                           |
| stress induced lethality increased             | WBPhenotype:0000141 | 0.009                    | h2afx, hist1h2ab                                      |
| hermaphrodite sterile                          | WBPhenotype:0000694 | 0.009                    | mcm3, h2afx, hist1h2ab, hist1h2ba, hdac1              |

**Supplementary Table S6. Primers used in this study.**

| Gene Name     | NCBI Accession No. | Forward primer                  | Reverse primer                                                     | Application        |
|---------------|--------------------|---------------------------------|--------------------------------------------------------------------|--------------------|
| <i>udu</i>    | NM_001201535.1     | gatccaccatgggatggaacgcaagtc     | aaggcggccgctcactgtcgtcatcgtctttgtag<br>tcgtcctgctcttcatcag         | Cloning-expression |
| <i>bap1</i>   | NM_001163837.1     | ctcgagatgaacaaaggttgctgg        | tctagactattgccgtttggcttt                                           | Cloning-expression |
|               |                    | gtcacaacacgagggttcg             | gtcctcctctggctcatcaatctt                                           | Cloning-probe      |
| <i>bnip1</i>  | XM_009292526.3     | tttcaccatggggacttactcagac       | aactcacagatcctcttctgagatgagttttgtcc<br>ctgttcagctgcgtatc           | Cloning-expression |
| <i>brd4</i>   | NM_001111281.1     | ccgccaccatgggggacggcctggac      | gccttacagatcctcttctgagatgagttttgttcg<br>aacaagttctcctcaaa          | Cloning-expression |
| <i>cry3a</i>  | NM_001313822.1     | cagccaccatggcccaaatccatc        | tgtgcggccgcttacagatcctcttctgagatgagt<br>ttttgttactcctcacttactgactg | Cloning-expression |
| <i>dnmt1</i>  | NM_131189.2        | cgagaattcaatgcctaccaagacctca    | gaagcggccgcttagtcagagagctcca                                       | Cloning-expression |
| <i>ephx2</i>  | XM_021467153.1     | agtccaccatgaagaaggcagtggtg      | ggttcacagatcctcttctgagatgagttttgttcta<br>actgggatgaacaga           | Cloning-expression |
| <i>foxa2</i>  | NM_130949.2        | tttcaccatgctcgggtgctgtcaaa      | aaattacagatcctcttctgagatgagttttgttcg<br>gaagagttcaggatggg          | Cloning-expression |
| <i>gc</i>     | NM_001002568.2     | aatccaccatgatgaatgcatcttta      | tggttacagatcctcttctgagatgagttttgttcag<br>cagcactgtcatcatc          | Cloning-expression |
| <i>kif20a</i> | NM_001161470.1     | ctgccaccatggctctggcgtctcca      | aaattacagatcctcttctgagatgagttttgttcat<br>acttgactcggagcat          | Cloning-expression |
| <i>lias</i>   | NM_001110401.1     | ctaccaccatggcgttgatcagtaga      | agtttacagatcctcttctgagatgagttttgttctc<br>ctgctggtgctgtggt          | Cloning-expression |
| <i>thoc1</i>  | NM_201324.1        | tgcgcggccgcatgtctcctcctcgtctcac | tcgtctagattatgttcgctcagatt                                         | Cloning-expression |
| <i>cebpa</i>  | NM_131885.2        | catctacgacagccaagcaa            | ctggagatgcatgggtggttt                                              | qPCR               |
| <i>gapdh</i>  | NM_001115114.1     | gtggagttactggtgtcttc            | gtgcaggaggcattgcttaca                                              | qPCR               |

## Supplementary Figures

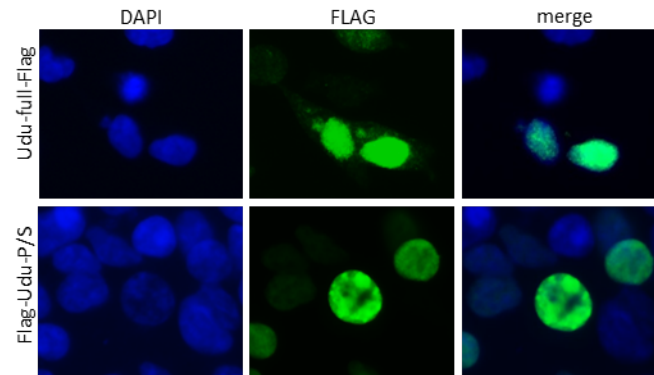

### Supplementary Figure S1. Immunofluorescent staining for the nuclear localization of Udu.

HEK293 cells were transfected with either Flag-tagged Udu-full (upper panels) or Udu-P/S (lower panels). For subsequent immunofluorescent staining analysis, anti-FLAG M2 monoclonal antibody and Alexa Fluor 488-conjugated anti-mouse secondary antibody were used. Images were taken under fluorescent microscope. Green fluorescence indicates Udu-full or Udu-P/S. Blue color is DAPI used for nuclear counterstain.

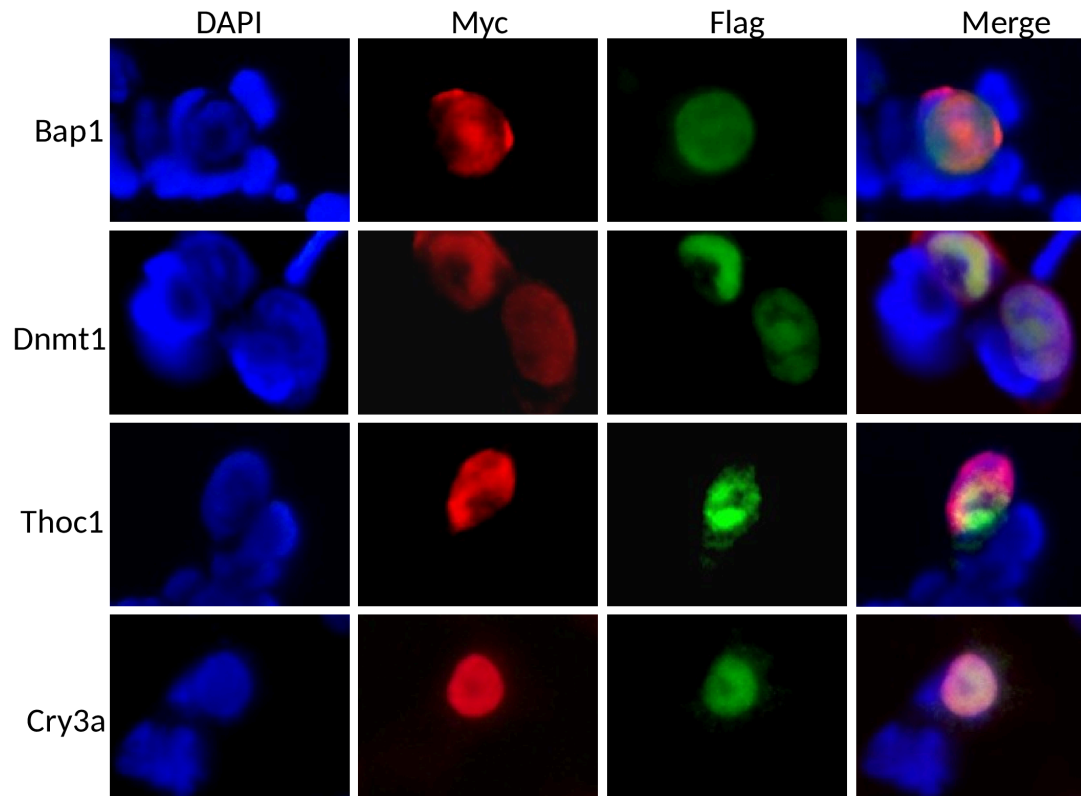

**Supplementary Figure S2. Immunofluorescent staining for the cellular co-localization analysis of Udu and its interacting proteins.** Flag-tagged Udu-full construct was co-transfected individually with each Myc-tagged construct, including Bap1, Dnmt1, Thoc1, and Cry3a. Anti-FLAG M2 monoclonal antibody and rabbit anti-MYC antibody were used. Alexa Fluor 488-conjugated anti-mouse secondary antibody and Alexa Fluor 564-conjugated anti-rabbit secondary antibody were then applied. Green fluorescence indicates Udu-full, while red fluorescence indicates the expression of Myc-tagged proteins. Blue color is DAPI used for nuclear counterstain. Merged images show the nuclear co-localization of Udu and the interacting proteins.

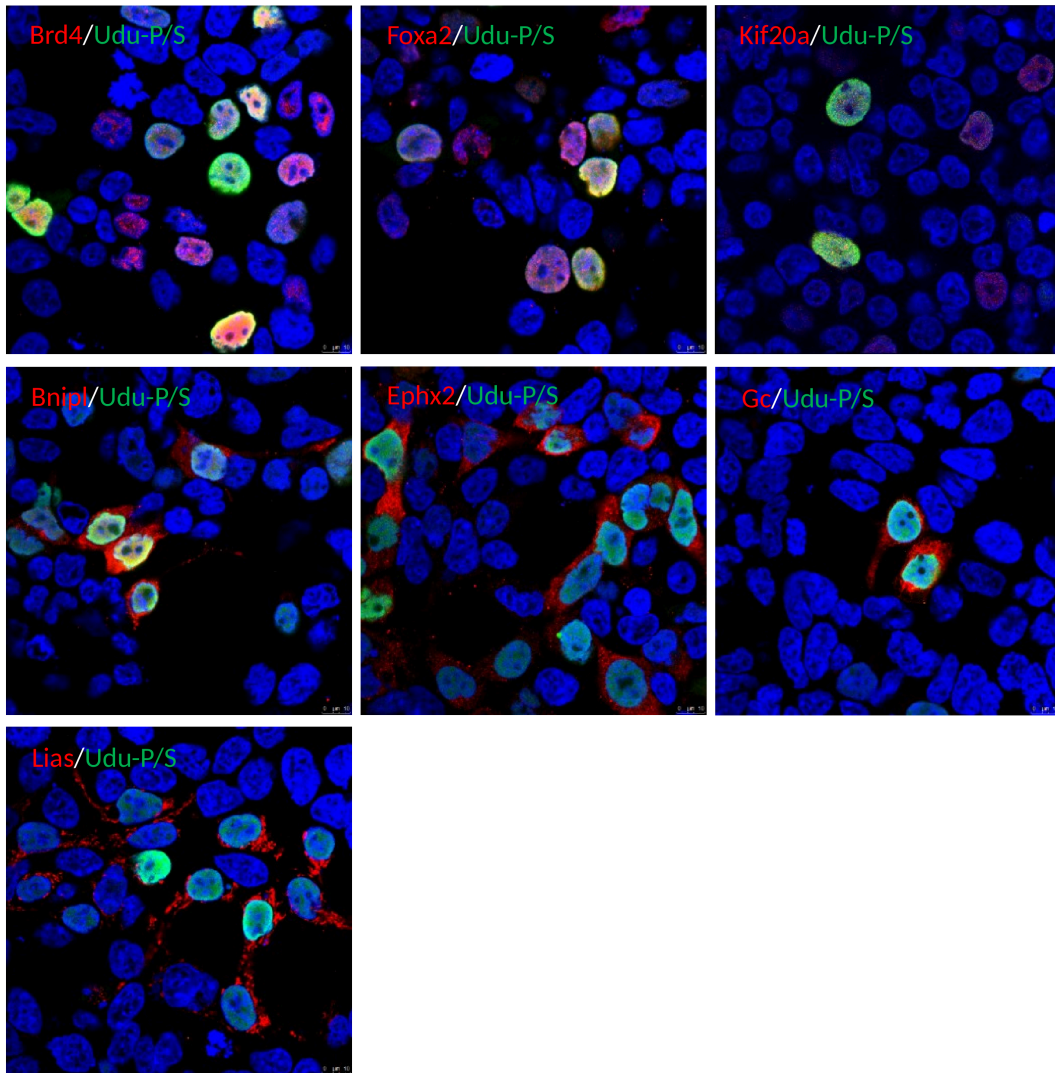

**Supplementary Figure S3. Confocal images for the cellular co-localization analysis of Udu and its candidate interacting proteins.**

For co-localization analysis, Flag-tagged Udu-P/S construct was co-transfected individually with each Myc-tagged construct, including the nucleus-localized Brd4, Foxa2, Kif20a, and Bnip1, the cytoplasm-localized Bnip1, Ephx2 and Gc, and the mitochondrial protein Lias (Ref.). Note that Bnip1 is expressed both in the nucleus and in the cytoplasm. Anti-FLAG M2 monoclonal antibody and rabbit anti-MYC antibody were used. Alexa Fluor 488-conjugated anti-mouse secondary antibody and Alexa Fluor 564-conjugated anti-rabbit secondary antibody were then applied. Green fluorescence indicates Udu-P/S, while red fluorescence indicates the expression of Myc-tagged proteins. Blue color is DAPI used for nuclear counterstain.

**Ref.:** Mayr, J.A., Zimmermann, F.A., Fauth, C., Bergheim, C., Meierhofer, D., Radmayr, D., Zschocke, J., Koch, J., Sperl, W., 2011. Lipoic acid synthetase deficiency causes neonatal-onset epilepsy, defective

mitochondrial energy metabolism, and glycine elevation. *Am. J. Hum. Genet.* **89**, 792-797.



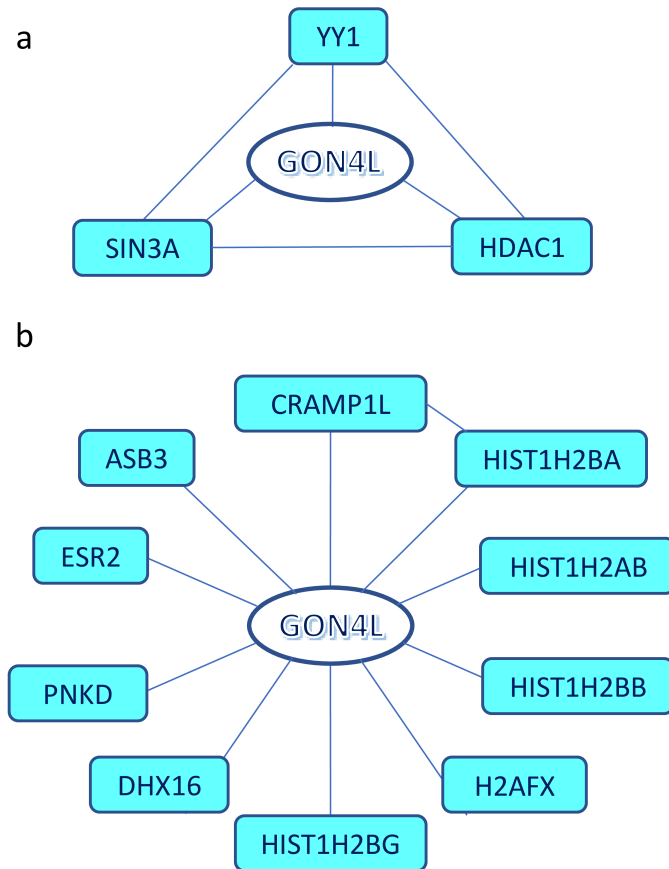

**Supplementary Figure S4. Networks between Gon4l and its interactors.**

Physical interactors for Gon4l were identified from (a) mouse or (b) human datasets of BioGRID.

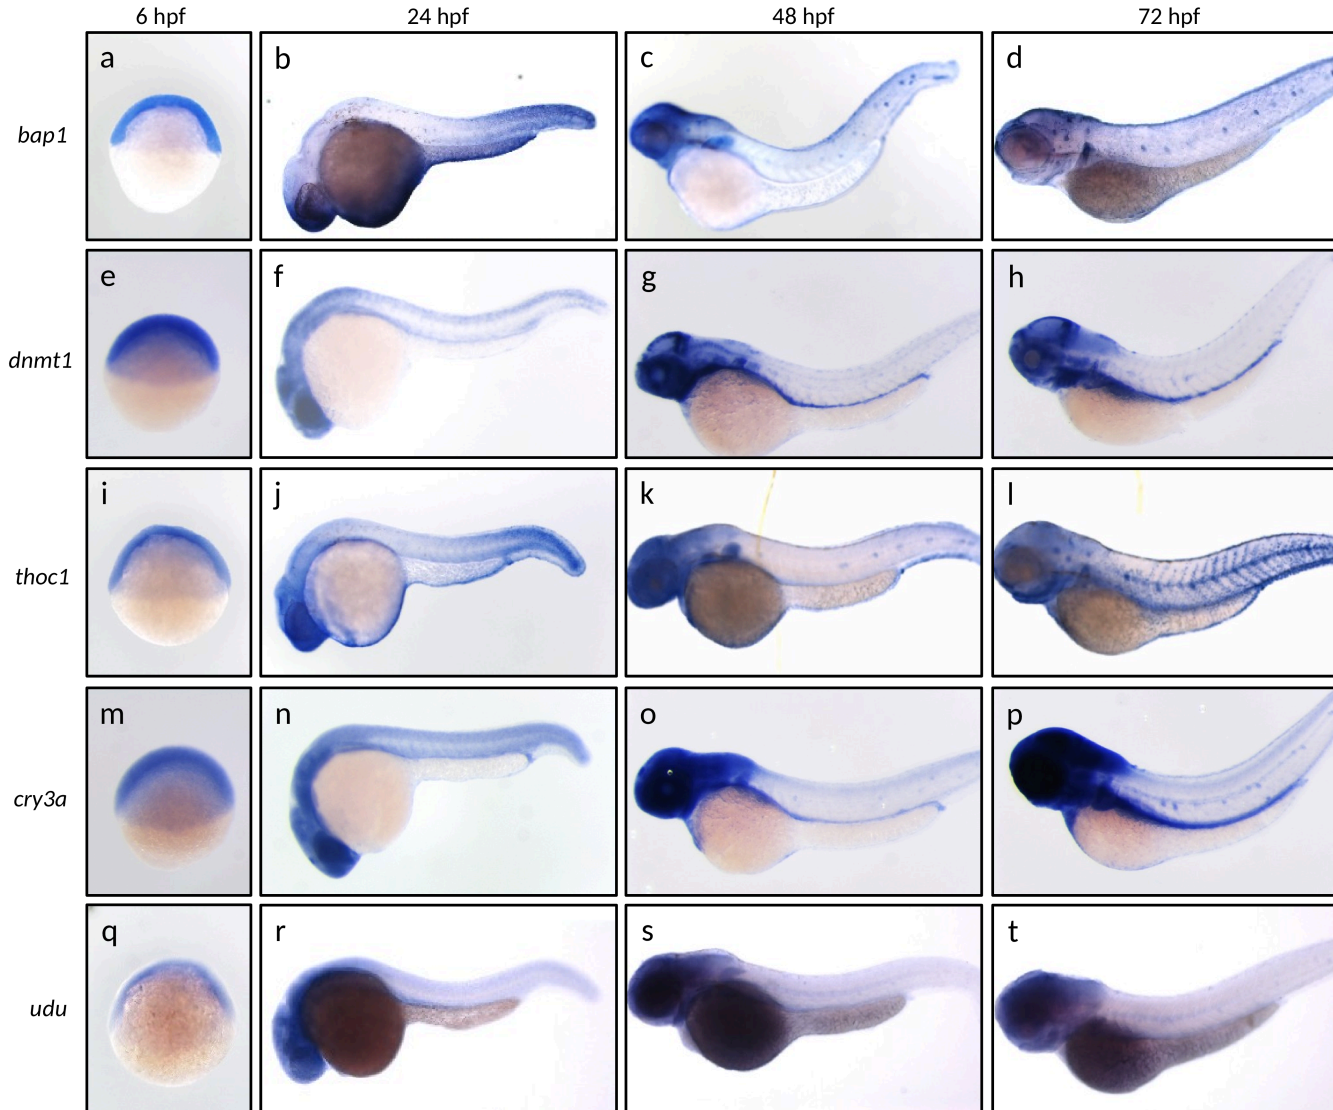

**Supplementary Figure S5. Whole mount *in situ* hybridization analysis for the expression of *bap1*, *dnmt1*, *thoc1*, *cry3a*, and *udu* genes during zebrafish early development.**

Wild type embryos were harvested to analyze the temporal and spatial expressions of (a–d) *bap1*, (e–h) *dnmt1*, (i–l) *thoc1*, (m–p) *cry3a*, and (q–t) *udu* genes at indicated time points. Embryos are orientated with anterior to the left.

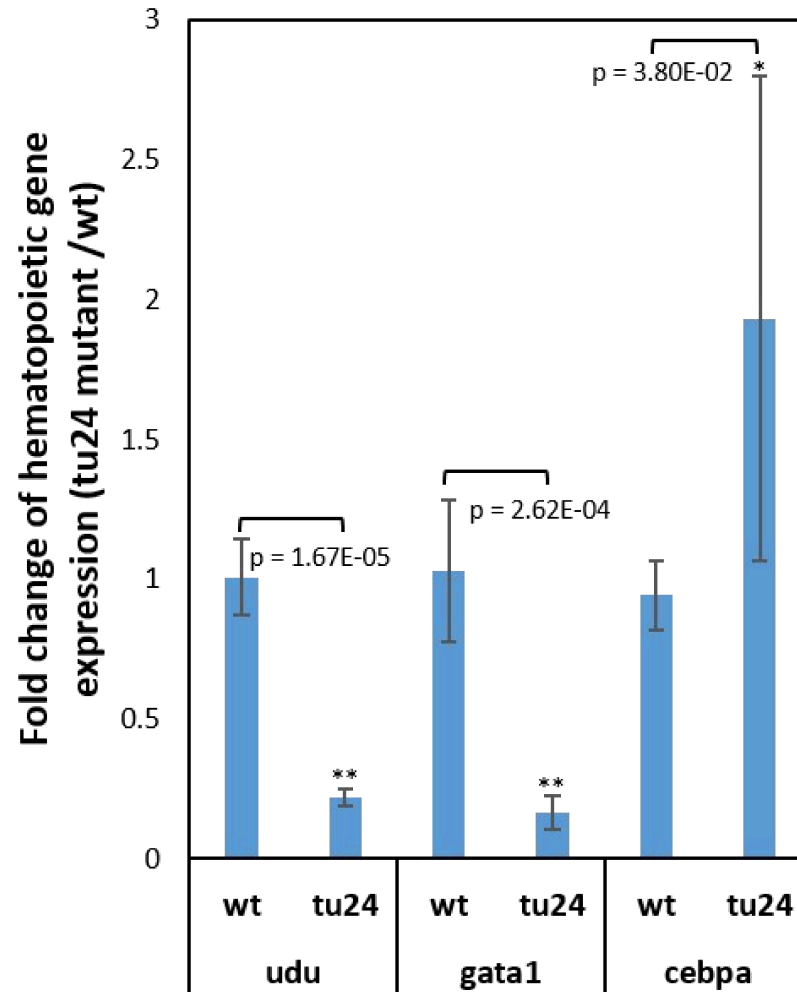

**Supplementary Figure S6. Quantitative real-time PCR (Q-PCR) analysis for *cebpa* expression.**

Expression levels of *udu*, *gata1* and *cebpa* in *udu*<sup>tu24</sup> mutants at 22 hpf were detected and compared with that in WT larvae at the same stage by relative Q-PCR analysis. Data were normalized to *gapdh* and expressed as fold-induction compared to WT (mean +/- SD). \*, p<0.05; \*\*, p<0.001.

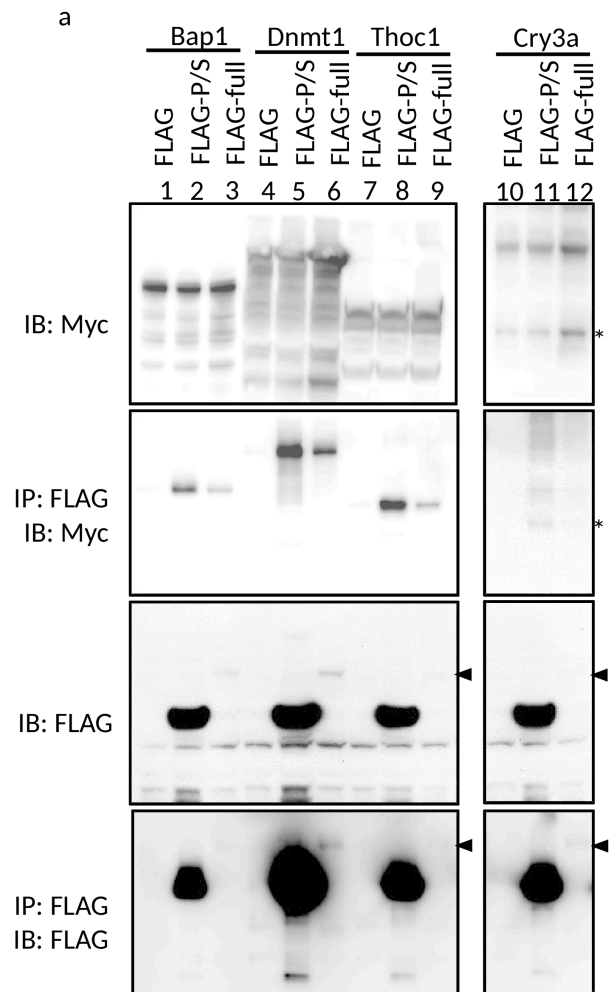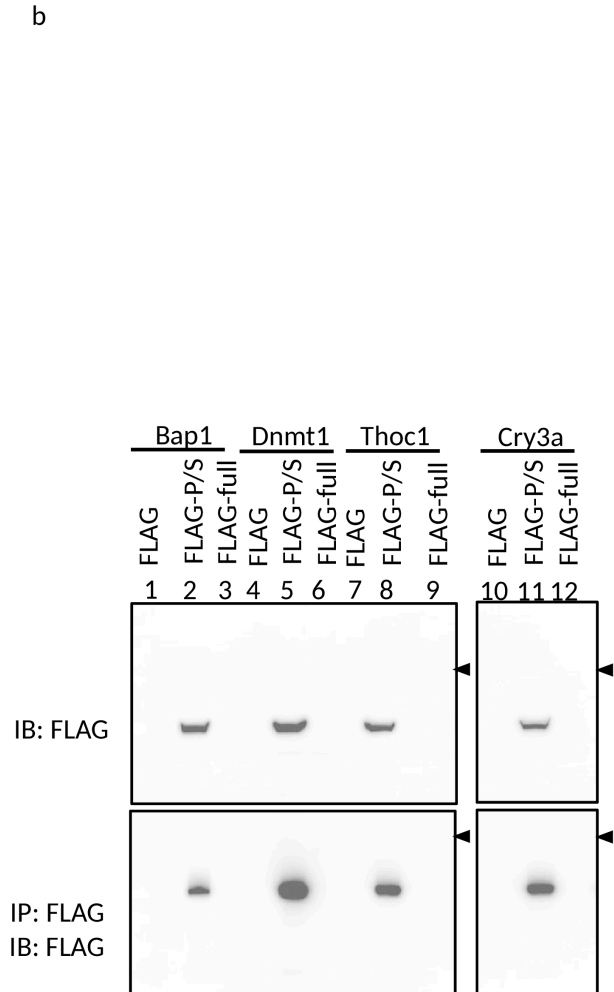

**Supplementary Figure S7.  
Co-immunoprecipitation  
and Western blot analysis  
for the interaction of Udu  
with Bap1, Dnmt1, Thoc1,  
and Cry3a.**

(a) Full-length blots of Figure 3 are shown here as supporting information. Samples for Bap1, Dnmt1 and Thoc1 were loaded in the same gel, while Cry3a was loaded in the other. To observe the weak expression of full-length Udu, anti-FLAG immunoblot was detected for longer exposure time as shown in panel a. The asterisk indicates the band for Cry3a. Arrowheads indicate the expected size for full-length Udu. (b) Shorter exposure time for FLAG Western blots are also shown.
